# Supplementary material
Source: Springer Nature journal article supplement (https://www.springermedizin.de/resource/supplementary/12936_2004_75_MOESM1_ESM.pdf/9546912)

a

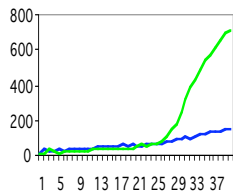

b

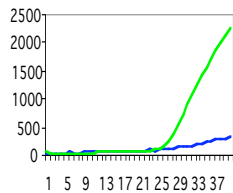

c

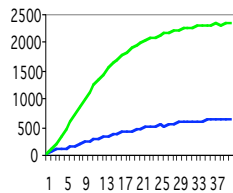

d

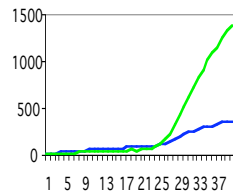

e

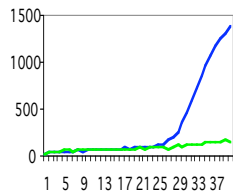

f

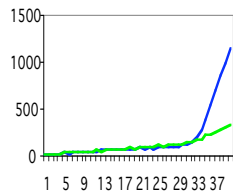

g

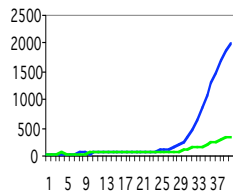

h

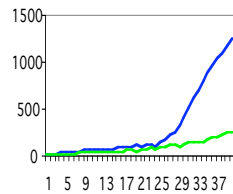

Supplement: MOESM1 [file 9546912]
